# Supplementary material
Source: PubMed Central journal article supplement (PMC1635086)

**A**

1 2 3 4 5 6

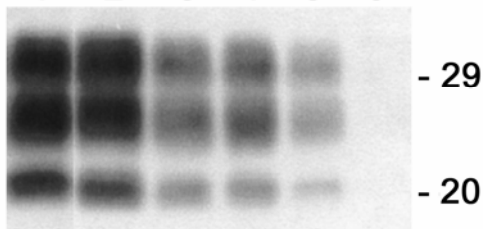**B**

1 2 3 4 5 6 7 8 9

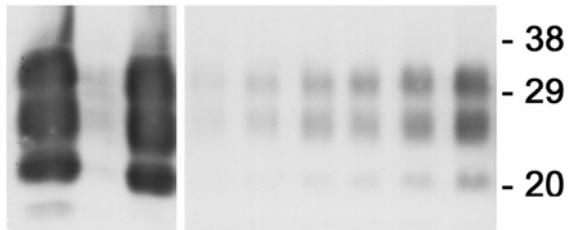

Supplement: pnas_0605608103_1.pdf [file pnas_0605608103_1.pdf]
